# Supplementary material for: Seaweed and Seaweed Bioactives for Mitigation of Enteric Methane: Challenges and Opportunities
Source: PubMed Central journal article supplement (PMC7766277; doi:10.3390/ani10122432), 2020-12-18
Supplement: animals-10-02432-s001.pdf [file animals-10-02432-s001.pdf]

Supplementary Table 1: Summary of in vitro studies reporting no methane mitigation effects of seaweeds.

| Seaweed species                  | Substrate                                        | Seaweed dose (% of dry matter (DM) or organic matter (OM) incubated) | Digestibility, or TVFA                                               | TGP | Reference |
|----------------------------------|--------------------------------------------------|----------------------------------------------------------------------|----------------------------------------------------------------------|-----|-----------|
| <i>Acrosiphonia</i> spp. (G)     | Seaweed alone, spring and autumn                 | 100                                                                  | Mitigation examined                                                  | not | [43]      |
| <i>Alaria esculenta</i> (B)      | F:C, 50:50                                       | 10; harvested spring and autumn                                      | No effect on TVFA                                                    | on  | [144]     |
| <i>Alaria esculenta</i> (B)      | Seaweed alone (no mitigation), spring and autumn | 100                                                                  | Mitigation examined                                                  | not | [43]      |
| <i>Ascophyllum nodosum</i> (B)   | F:C, 50:50                                       | 5                                                                    | No effect on TGP, TVFA, or DOM degradability decreased)              | (N  | [59]      |
| <i>Caulerpa taxifolia</i> (G)    | Rhodes grass hay                                 | 2, 3.8, 7.4, 13.8                                                    | TGP reduced at dose 7.4:92.6                                         |     | [50]      |
| <i>Caulerpa taxifolia</i> (G)    | Rhodes grass hay                                 | 5%                                                                   | 2-5% decrease in TGP, 12% decrease in TVFA, no effect on DOM at 72 h |     | [11]      |
| <i>Cladophora coelothrix</i> (G) | Flinders grass and CSM                           | 16.6                                                                 | No effect on TGP                                                     | on  | [12]      |

|                                              |                        |                                  |                                                                      |       |
|----------------------------------------------|------------------------|----------------------------------|----------------------------------------------------------------------|-------|
| <i>Cladophora patentiramea</i> (G)           | Rhodes grass hay       | 5%                               | 2-5% decrease in TGP, 23% decrease in TVFA, no effect on DOM at 72 h | [11]  |
| <i>Cladophora rupestris</i> (G)              | F:C, 50:50             | 4.2; harvested spring and autumn | No effect on TVFA                                                    | [145] |
| <i>Cladophora vagabunda</i> (FW)             | Flinders grass and CSM | 16.6                             | No effect on TGP                                                     | [48]  |
| <i>Cystoseria trinodis</i> (B)               | Rhodes grass hay       | 5%                               | 2-5% decrease in TGP, 12% decrease in TVFA, no effect on DOM at 72 h | [11]  |
| <i>Derbesia tenuissima</i> (G)               | Flinders grass and CSM | 16.6                             | No effect on TGP                                                     | [48]  |
| <i>Dictyota bartayresii</i> (B)              | Rhodes grass hay       | 5%                               | 2-5% decrease in TGP, 23% decrease in TVFA, no effect on DOM at 72 h | [11]  |
| <i>Ecklonia stolonifera</i> (B) (3 extracts) | Timothy hay            | 1, 3, 5                          | No decrease in TGP or DDM; decreased TVFA at 48 h                    | [77]  |
| <i>Gigartina</i> spp. (R)                    | Corn silage            | 25                               | TGP decreased                                                        | [50]  |
| <i>Gracilaria vermiculophylla</i> (R)        | Total mixed ration     | 25                               | No effect on TGP or OMD                                              | [144] |
| <i>Halymenia floresii</i> (R)                | Flinders grass and CSM | 16.6                             | No effect on TGP                                                     | [48]  |

|                                      |                                                     |                                  |                                                                      |       |
|--------------------------------------|-----------------------------------------------------|----------------------------------|----------------------------------------------------------------------|-------|
| <i>Laminaria digitata</i> (B)        | Seaweed alone (no mitigation),, spring and autumn   | 100                              | Mitigation not examined                                              | [42]  |
| <i>Laminaria digitata</i> (B)        | F:C, 50:50                                          | 5                                | No effect on TGP, TVFA, or DOM                                       | [58]  |
| <i>Laminaria digitata</i> (B)        | F:C, 50:50                                          | 10; harvested spring and autumn  | No effect on TVFA                                                    | [144] |
| <i>Laminaria ochroleuca</i> (B)      | Meadow hay                                          | 25                               | No effect on TGP                                                     | [50]  |
| <i>Laminaria ochroleuca</i> (B)      | Corn silage                                         | 25                               | TGP decreased                                                        | [50]  |
| <i>Mastocarpus stellatus</i> (R)     | F:C, 50:50                                          | 7.5; harvested spring and autumn | No effect on TVFA                                                    | [144] |
| <i>Mastocarpus stellatus</i> (R)     | Seaweed harvested spring and autumn (no mitigation) | 100                              | Mitigation not examined                                              | [42]  |
| <i>Oedogonium</i> spp. (FW)          | Rhodes grass hay                                    | 2, 3.8, 7.4, 13.8                | No effect on TGP                                                     | [49]  |
| <i>Padina australis</i> (B)          | Rhodes grass hay                                    | 5%                               | 2-5% decrease in TGP, 15% decrease in TVFA, no effect on DOM at 72 h | [11]  |
| <i>Palmaria palmata</i> (R)          | F:C, 50:50                                          | 6.5; harvested spring and autumn | No effect on TVFA                                                    | [210] |
| <i>Palmaria palmata</i> extract) (R) | (1 Timothy grass silage                             | grass 13, 23, 31                 | No decrease in TGP or DOM                                            | [9]   |

|                                           |      |                                                  |       |                                  |                                       |       |
|-------------------------------------------|------|--------------------------------------------------|-------|----------------------------------|---------------------------------------|-------|
| <i>Palmaria palmata</i> extracts) (R)     | (2)  | Timothy silage                                   | grass | 7, 13, 18                        | No decrease in TGP or DOM             | [9]   |
| <i>Palmaria palmata</i> (R)               |      | Seaweed alone, spring and autumn (no mitigation) |       | 100                              | Mitigation not examined               | [42]  |
| <i>Pelvetia canaliculata</i> (B)          |      | F:C, 50:50                                       |       | 7.5; harvested spring and autumn | No effect on TVFA                     | [145] |
| <i>Pelvetia canaliculata</i> (B)          |      | Seaweed alone, spring and autumn (no mitigation) |       | 100                              | Mitigation not examined               | [42]  |
| <i>Porphyra</i> (R)                       | spp. | F:C, 50:50                                       |       | 4.2; harvested spring and autumn | No effect on TVFA                     | [144] |
| <i>Porphyra</i> (R)                       | spp. | Seaweed alone, spring and autumn (no mitigation) |       | 100                              | Mitigation not examined               | [42]  |
| <i>Saccharina latissimi</i> extracts) (B) | (4)  | Timothy silage                                   | grass | 13, 23, 31                       | No decrease in TGP or DOM             | [9]   |
| <i>Saccharina latissimi</i> (B)           |      | F:C, 50:50                                       |       | 7.5; harvested spring and autumn | No effect on TVFA                     | [145] |
| <i>Saccharina latissimi</i> (B)           |      | Meadow hay                                       |       | 25                               | No effect on TGP                      | [50]  |
| <i>Saccharina latissimi</i> (B)           |      | Corn silage                                      |       | 25                               | No effect on TGP                      | [50]  |
| <i>Saccharina latissimi</i> (B)           |      | Total mixed ration                               |       | 25                               | No effect on TGP or OMD               | [145] |
| <i>Sargassum flavicans</i> (B)            |      | Rhodes grass hay                                 |       | 5%                               | 2-5% decrease in TGP, 15% decrease in | [11]  |

|                               |                           |                    |                                                                                  |                                   |       |
|-------------------------------|---------------------------|--------------------|----------------------------------------------------------------------------------|-----------------------------------|-------|
|                               |                           |                    |                                                                                  | TVFA, no effect<br>on DOM at 72 h |       |
| <i>Spirogyra</i> spp.<br>(FW) | Flinders grass and<br>CSM | 16.6               | No effect on<br>TGP                                                              |                                   | [49]  |
| Tarong<br>polyculture<br>(FW) | Rhodes grass              | 2;, 3.8, 7.4, 13.8 | No effect on<br>TGP                                                              |                                   | [50]  |
| <i>Ulva ohnoi</i> (G)         | Rhodes grass              | 5%                 | 2-5% decrease in<br>TGP, 16%<br>decrease in<br>TVFA, no effect<br>on DOM at 72 h |                                   | [15]  |
| <i>Ulva rigida</i> (G)        | Total mixed ration        | 25                 | No effect on<br>TGP or OMD                                                       |                                   | [145] |
| <i>Ulva</i> spp. (G)          | Corn silage               | 25                 | No effect on<br>TGP                                                              |                                   | [51]  |

B, brown; CSM, cottonseed meal; DM, dry matter; DOM, degradability of organic matter; F:C, forage:concentrate ratio; FW, fresh water algae; G, green; OM, organic matter; R, red; TGP, total gas production; TVFA, total volatile fatty acids
